# Supplementary material for: Concordance of Computed Tomography Regional Body Composition Analysis Using a Fully Automated Open-Source Neural Network versus a Reference Semi-Automated Program with Manual Correction
Source: MDPI journal article supplement (doi:10.3390/s22093357), 2022-04-27
Supplement: s1 [file s1]

## Online Supplementary Materials

**Title:** Concordance of computed tomography regional body composition analysis using fully automated open-source framework versus a reference semi-automated program with manual correction

**Authors:**<sup>1</sup>Gomez-Perez, Sandra, PhD, RDN, <sup>2</sup>Zhang, Yanyu, MS, <sup>3</sup>Byrne, Cecily, MS, RDN, <sup>4</sup>Wakefield, Connor, MD, <sup>5</sup>Geesey, Thomas, MD, <sup>5</sup>Sclamberg, Joy, MD, <sup>1</sup>Peterson, Sarah, PhD, RDN

**Affiliations:**

<sup>1</sup> Rush University, Department of Clinical Nutrition, Chicago, IL, USA

<sup>2</sup> Rush University Medical Center, Rush Bioinformatics and Biostatistics Core, Chicago, IL, USA

<sup>3</sup> University of Illinois at Chicago, Department of Kinesiology and Nutrition, Chicago, IL, USA

<sup>4</sup> Brooke Army Medical Center, Department of Internal Medicine, Fort Sam Houston, TX, USA

<sup>5</sup> Rush University Medical Center, Department of Radiology, Chicago, IL, USA

**Corresponding Author:** Sandra Gomez-Perez, PhD, RDN; Rush University Medical Center, Department of Clinical Nutrition, Armour Academic Center, 600 S. Paulina St, AAC 737D, Chicago, IL, 60612; email: [sandra\\_1\\_gomez-perez@rush.edu](mailto:sandra_1_gomez-perez@rush.edu)

**Key Words:** agreement, computed tomography, automated segmentation, regional body composition, abdominal tissues

**Table S1.** DSC by Sex

|            | ALL (n=418) | Female (n=231) |      |      | Male (n=187) |      |      | P-value* |
|------------|-------------|----------------|------|------|--------------|------|------|----------|
|            |             | N              | Mean | SD   | N            | Mean | SD   |          |
| Muscle CSA | 0.97        | 231            | 0.97 | 0.06 | 187.00       | 0.98 | 0.06 | 0.00     |
| VAT CSA    | 0.92        | 231            | 0.91 | 0.19 | 187.00       | 0.92 | 0.15 | 0.12     |
| SAT CSA    | 0.93        | 231            | 0.94 | 0.14 | 187.00       | 0.93 | 0.14 | 0.00     |
| IMAT CSA   | 0.83        | 220            | 0.85 | 0.15 | 176.00       | 0.81 | 0.13 | <.0001   |
| Muscle HU  | 0.98        | 213            | 0.98 | 0.08 | 168.00       | 0.99 | 0.02 | 0.69     |
| VAT HU     | 0.99        | 213            | 0.98 | 0.08 | 168.00       | 0.99 | 0.04 | 0.01     |
| SAT HU     | 0.98        | 213            | 0.98 | 0.07 | 168.00       | 0.98 | 0.07 | <.0001   |
| IMAT HU    | 0.98        | 202            | 0.98 | 0.03 | 157.00       | 0.98 | 0.03 | 0.27     |

\*Mann-Whitney U Test

**Table S2.** DSC by Race/Ethnic categories

|            | ALL (n=420) | Black (n=223) |      |      | Other (n=28) |      |      | White (n=169) |      |      | P-value* |
|------------|-------------|---------------|------|------|--------------|------|------|---------------|------|------|----------|
|            |             | N             | Mean | SD   | N            | Mean | SD   | N             | Mean | SD   |          |
| Muscle CSA | 0.97        | 223           | 0.98 | 0.05 | 28.00        | 0.94 | 0.10 | 169.00        | 0.97 | 0.06 | <.0001   |
| VAT CSA    | 0.92        | 223           | 0.91 | 0.18 | 28.00        | 0.91 | 0.20 | 169.00        | 0.93 | 0.16 | 0.36     |
| SAT CSA    | 0.93        | 223           | 0.93 | 0.13 | 28.00        | 0.89 | 0.23 | 169.00        | 0.94 | 0.11 | 0.21     |
| IMAT CSA   | 0.83        | 212           | 0.82 | 0.14 | 20.00        | 0.85 | 0.18 | 166.00        | 0.85 | 0.15 | 0.00     |
| Muscle HU  | 0.98        | 206           | 0.99 | 0.04 | 23.00        | 0.93 | 0.16 | 154.00        | 0.98 | 0.06 | 0.35     |
| VAT HU     | 0.99        | 206           | 0.99 | 0.04 | 23.00        | 0.96 | 0.17 | 154.00        | 0.99 | 0.07 | 0.45     |
| SAT HU     | 0.98        | 206           | 0.98 | 0.08 | 23.00        | 0.98 | 0.05 | 154.00        | 0.98 | 0.04 | 0.00     |
| IMAT HU    | 0.98        | 195           | 0.99 | 0.02 | 15.00        | 0.97 | 0.07 | 151.00        | 0.98 | 0.04 | 0.95     |

\*Kruskal-Wallis Test

**Table S3.** DSC by BMI

|            | ALL (n=418) | Low/Normal (n=127) |      |      | Overweight (n=149) |      |      | Obese (n=142) |      |      | P-value* |
|------------|-------------|--------------------|------|------|--------------------|------|------|---------------|------|------|----------|
|            |             | N                  | Mean | SD   | N                  | Mean | SD   | N             | Mean | SD   |          |
| Muscle CSA | 0.97        | 127                | 0.97 | 0.04 | 149.00             | 0.98 | 0.06 | 142.00        | 0.97 | 0.07 | 0.00     |
| VAT CSA    | 0.92        | 127                | 0.90 | 0.17 | 149.00             | 0.93 | 0.17 | 142.00        | 0.92 | 0.18 | 0.00     |
| SAT CSA    | 0.93        | 127                | 0.91 | 0.18 | 149.00             | 0.95 | 0.09 | 142.00        | 0.94 | 0.13 | 0.03     |
| IMAT CSA   | 0.83        | 121                | 0.84 | 0.15 | 143.00             | 0.83 | 0.13 | 132.00        | 0.82 | 0.16 | 0.29     |
| Muscle HU  | 0.98        | 116                | 0.99 | 0.06 | 141.00             | 0.98 | 0.07 | 124.00        | 0.98 | 0.05 | 0.43     |
| VAT HU     | 0.99        | 116                | 0.98 | 0.09 | 141.00             | 0.99 | 0.07 | 124.00        | 0.99 | 0.02 | 0.00     |
| SAT HU     | 0.98        | 116                | 0.97 | 0.11 | 141.00             | 0.98 | 0.03 | 124.00        | 0.99 | 0.02 | 0.00     |
| IMAT HU    | 0.98        | 110                | 0.98 | 0.03 | 135.00             | 0.98 | 0.03 | 114.00        | 0.98 | 0.04 | 0.76     |

\*Kruskal-Wallis Test

**Table S4.** Bland – Altman and proportional bias statistics for females

| Comparisons |                  | N   | Bland-Altman                                                                |       |         |        |                                 |         |                      |
|-------------|------------------|-----|-----------------------------------------------------------------------------|-------|---------|--------|---------------------------------|---------|----------------------|
| Test Method | Reference Method |     | Bland-Altman plot (difference between AutoMATiCA and human-based technique) |       |         |        | Proportional bias               |         |                      |
|             |                  |     | mean                                                                        | SD    | lower   | upper  | Pearson correlation coefficient | P-value |                      |
| Muscle CSA  | SM               | 231 | 5.68                                                                        | 14.95 | -23.63  | 35.00  | 0.09                            | 0.17    | No Proportional bias |
| VAT CSA     | VAT              | 231 | 5.62                                                                        | 55.70 | -103.55 | 114.80 | 0.11                            | 0.10    | No Proportional bias |
| SAT CSA     | SAT              | 231 | 15.97                                                                       | 63.01 | -107.53 | 139.46 | 0.02                            | 0.71    | No Proportional bias |
| IMAT CSA    | IMAT             | 220 | -2.92                                                                       | 8.32  | -19.23  | 13.40  | -0.34                           | <.0001  | Proportional bias    |
| Muscle HU   | SMHU             | 213 | -1.30                                                                       | 16.49 | -33.61  | 31.01  | -0.67                           | <.0001  | Proportional bias    |
| VAT HU      | VATHU            | 213 | -0.69                                                                       | 9.44  | -19.19  | 17.80  | -0.56                           | <.0001  | Proportional bias    |
| SAT HU      | SATHU            | 213 | 0.22                                                                        | 6.52  | -12.56  | 13.00  | -0.43                           | <.0001  | Proportional bias    |
| IMAT HU     | IMATHU           | 202 | 0.37                                                                        | 4.99  | -9.41   | 10.15  | -0.25                           | 0.00    | Proportional bias    |

**Table S5.** Bland – Altman and proportional bias statistics for males

| Comparisons |                  | N   | Bland-Altman                                                                |       |        |       |                                 |         |                      |
|-------------|------------------|-----|-----------------------------------------------------------------------------|-------|--------|-------|---------------------------------|---------|----------------------|
| Test Method | Reference Method |     | Bland-Altman plot (difference between AutoMATiCA and human-based technique) |       |        |       | Proportional bias               |         |                      |
|             |                  |     | Mean                                                                        | SD    | lower  | upper | Pearson correlation coefficient | P-value |                      |
| Muscle CSA  | SM               | 187 | 1.58                                                                        | 19.64 | -36.92 | 40.08 | -0.14                           | 0.05    | No Proportional bias |
| VAT CSA     | VAT              | 187 | 2.63                                                                        | 27.80 | -51.86 | 57.13 | 0.03                            | 0.71    | No Proportional bias |
| SAT CSA     | SAT              | 187 | 4.61                                                                        | 44.39 | -82.39 | 91.60 | -0.04                           | 0.56    | No Proportional bias |
| IMAT CSA    | IMAT             | 176 | -4.61                                                                       | 5.69  | -15.76 | 6.54  | -0.57                           | <.0001  | Proportional bias    |
| Muscle HU   | SMHU             | 168 | 0.20                                                                        | 5.31  | -10.22 | 10.61 | -0.26                           | 0.00    | Proportional bias    |
| VAT HU      | VATHU            | 168 | -0.31                                                                       | 6.23  | -12.53 | 11.90 | -0.42                           | <.0001  | Proportional bias    |
| SAT HU      | SATHU            | 168 | 0.76                                                                        | 7.56  | -14.07 | 15.58 | -0.56                           | <.0001  | Proportional bias    |
| IMAT HU     | IMATHU           | 157 | 0.15                                                                        | 6.83  | -13.23 | 13.54 | -0.45                           | <.0001  | Proportional bias    |

**Table S6.** Bland–Altman and proportional bias statistics for Black race/ethnic category

| Comparisons |                  | N   | Bland-Altman                                                                |       |        |        |                                 |         |                      |
|-------------|------------------|-----|-----------------------------------------------------------------------------|-------|--------|--------|---------------------------------|---------|----------------------|
| Test Method | Reference Method |     | Bland-Altman plot (difference between AutoMATiCA and human-based technique) |       |        |        | Proportional bias               |         |                      |
|             |                  |     | Mean                                                                        | SD    | lower  | upper  | Pearson correlation coefficient | P-value |                      |
| Muscle CSA  | SM               | 223 | 2.92                                                                        | 13.56 | -23.67 | 29.50  | -0.06                           | 0.38    | No Proportional bias |
| VAT CSA     | VAT              | 223 | 4.23                                                                        | 51.11 | -95.95 | 104.40 | 0.00                            | 0.96    | No Proportional bias |
| SAT CSA     | SAT              | 223 | 11.35                                                                       | 52.14 | -90.84 | 113.54 | 0.05                            | 0.47    | No Proportional bias |
| IMAT CSA    | IMAT             | 212 | -3.96                                                                       | 7.01  | -17.71 | 9.79   | -0.36                           | <.0001  | Proportional bias    |
| Muscle HU   | SMHU             | 206 | -0.13                                                                       | 1.66  | -3.39  | 3.13   | -0.32                           | <.0001  | Proportional bias    |
| VAT HU      | VATHU            | 206 | -0.68                                                                       | 4.74  | -9.97  | 8.61   | -0.47                           | <.0001  | Proportional bias    |
| SAT HU      | SATHU            | 206 | 0.04                                                                        | 6.62  | -12.94 | 13.03  | -0.57                           | <.0001  | Proportional bias    |
| IMAT HU     | IMATHU           | 195 | -0.33                                                                       | 2.66  | -5.55  | 4.88   | 0.00                            | 0.98    | No Proportional bias |

**Table S7.** Bland–Altman and proportional bias statistics for White race/ethnic category

| Comparisons |                  | N   | Bland-Altman                                                                |       |        |        |                                 |         |                      |
|-------------|------------------|-----|-----------------------------------------------------------------------------|-------|--------|--------|---------------------------------|---------|----------------------|
| Test Method | Reference Method |     | Bland-Altman plot (difference between AutoMATiCA and human-based technique) |       |        |        | Proportional bias               |         |                      |
|             |                  |     | Mean                                                                        | SD    | lower  | upper  | Pearson correlation coefficient | P-value |                      |
| Muscle CSA  | SM               | 169 | 4.60                                                                        | 18.25 | -31.16 | 40.36  | -0.18                           | 0.02    | Proportional bias    |
| VAT CSA     | VAT              | 169 | 4.16                                                                        | 36.49 | -67.37 | 75.69  | 0.15                            | 0.05    | No Proportional bias |
| SAT CSA     | SAT              | 169 | 7.89                                                                        | 48.12 | -86.43 | 102.21 | 0.08                            | 0.29    | No Proportional bias |
| IMAT CSA    | IMAT             | 166 | -3.38                                                                       | 7.56  | -18.20 | 11.44  | -0.49                           | <.0001  | Proportional bias    |
| Muscle HU   | SMHU             | 154 | -0.04                                                                       | 10.40 | -20.42 | 20.34  | -0.41                           | <.0001  | Proportional bias    |
| VAT HU      | VATHU            | 154 | 0.16                                                                        | 9.01  | -17.51 | 17.83  | -0.46                           | <.0001  | Proportional bias    |
| SAT HU      | SATHU            | 154 | 1.26                                                                        | 7.13  | -12.72 | 15.25  | -0.40                           | <.0001  | Proportional bias    |
| IMAT HU     | IMATHU           | 151 | 0.75                                                                        | 7.73  | -14.39 | 15.89  | -0.52                           | <.0001  | Proportional bias    |

**Table S8.** Bland–Altman and proportional bias statistics for Others race/ethnic category

| Comparisons |                  | N   | Bland-Altman                                                                |       |        |        |                                 |         |                      |
|-------------|------------------|-----|-----------------------------------------------------------------------------|-------|--------|--------|---------------------------------|---------|----------------------|
| Test Method | Reference Method |     | Bland-Altman plot (difference between AutoMATiCA and human-based technique) |       |        |        | Proportional bias               |         |                      |
|             |                  |     | mean                                                                        | SD    | lower  | upper  | Pearson correlation coefficient | P-value |                      |
| Muscle CSA  | SM               | 169 | 4.60                                                                        | 18.25 | -31.16 | 40.36  | -0.18                           | 0.02    | Proportional bias    |
| VAT CSA     | VAT              | 169 | 4.16                                                                        | 36.49 | -67.37 | 75.69  | 0.15                            | 0.05    | No Proportional bias |
| SAT CSA     | SAT              | 169 | 7.89                                                                        | 48.12 | -86.43 | 102.21 | 0.08                            | 0.29    | No Proportional bias |
| IMAT CSA    | IMAT             | 166 | -3.38                                                                       | 7.56  | -18.20 | 11.44  | -0.49                           | <.0001  | Proportional bias    |
| Muscle HU   | SMHU             | 154 | -0.04                                                                       | 10.40 | -20.42 | 20.34  | -0.41                           | <.0001  | Proportional bias    |
| VAT HU      | VATHU            | 154 | 0.16                                                                        | 9.01  | -17.51 | 17.83  | -0.46                           | <.0001  | Proportional bias    |
| SAT HU      | SATHU            | 154 | 1.26                                                                        | 7.13  | -12.72 | 15.25  | -0.40                           | <.0001  | Proportional bias    |
| IMAT HU     | IMATHU           | 151 | 0.75                                                                        | 7.73  | -14.39 | 15.89  | -0.52                           | <.0001  | Proportional bias    |
